## Erratum

### Interactions between HIV-1 nucleocapsid protein and viral DNA may have important functions in the viral life cycle

by M.Lapadat-Tapolsky, H.De Rocquigny, D.Van Gent, B.Roques, R.Plasterk and J.-L.Darlix

*Nucleic Acids Research*, **21**, pp. 831–839 (1993)

The Publishers wish to apologize for an incorrect presentation of text accompanying this paper. The peptide structures featured in 'Table I' should appear in the text of the 'Materials and Methods' under the section entitled 'Preparation of NCp7 and NCp7 mutants'. The correct version of Table I is reprinted below.

**Table I.** Percentage of DNA present in high molecular weight complexes in the presence of NCp7 and NCp7 mutants

| Peptide    | Linear pmCG7 | Supercoiled pmCG7 |
|------------|--------------|-------------------|
| No Peptide | 5            | 0                 |
| NCp7       |              |                   |
| 0.5 µg     | 90           | 90                |
| 1.0 µg     | 100          | 100               |
| NCp7A      |              |                   |
| 0.5 µg     | 25           | 15                |
| 1.0 µg     | 70           | 45                |
| NCp7B      |              |                   |
| 0.3 µg     | 90           | 90                |
| 0.5 µg     | 100          | 100               |
| NCp7C      |              |                   |
| 0.2 µg     | 75           | 20                |
| 0.4 µg     | 100          | 95                |
| NCp7D      |              |                   |
| 0.4 µg     | 10           | 5                 |

Values are averages of 3 experiments
